# Supplementary material
Source: PubMed Central journal article supplement (PMC3067426)
Supplement: supp_77_7_2359__1.pdf [file supp_77_7_2359__1.pdf]

Supplementary Fig. 1:

Table with all 266 *C. jejuni* isolates included in this study in the order deduced from the MLST-based UPGMA-tree.

| isolate    | origin  | MLST-ST | MLST-CC | <i>cj1367</i> | <i>cj1585c</i> | <i>dtlp7</i> | <i>dmsA</i> | <i>ansB</i> | <i>ggt</i> | group |
|------------|---------|---------|---------|---------------|----------------|--------------|-------------|-------------|------------|-------|
| bovC401    | cow     | 21      | 21      | 1             | 0              | 1            | 0           | 0           | 0          | 1A    |
| huBfR4012  | human   | 21      | 21      | 1             | 1              | 1            | 0           | 0           | 0          | 1A    |
| meC0318    | turkey  | 21      | 21      | 1             | 1              | 1            | 0           | 0           | 0          | 1A    |
| bov137     | cow     | 21      | 21      | 1             | 1              | 1            | 0           | 0           | 0          | 1A    |
| bovC086    | cow     | 21      | 21      | 1             | 1              | 1            | 0           | 0           | 0          | 1A    |
| gal518     | chicken | 21      | 21      | 1             | 1              | 1            | 0           | 0           | 0          | 1A    |
| galBfR3935 | chicken | 21      | 21      | 1             | 1              | 1            | 0           | 0           | 0          | 1A    |
| huC26      | human   | 21      | 21      | 1             | 1              | 1            | 0           | 0           | 0          | 1A    |
| gal7089RP  | chicken | 21      | 21      | 1             | 1              | 0            | 0           | 0           | 0          | 1A    |
| huA18      | human   | 21      | 21      | 1             | 1              | 1            | 0           | 0           | 0          | 1A    |
| gal7255BY  | chicken | 21      | 21      | 1             | 1              | 1            | 0           | 0           | 0          | 1A    |
| bovC567    | cow     | 21      | 21      | 1             | 1              | 1            | 0           | 0           | 0          | 1A    |
| bov79      | cow     | 21      | 21      | 1             | 1              | 1            | 0           | 0           | 0          | 1A    |
| bovC404    | cow     | 21      | 21      | 1             | 1              | 1            | 0           | 0           | 0          | 1A    |
| bovC536    | cow     | 21      | 21      | 1             | 1              | 1            | 0           | 0           | 0          | 1A    |
| bovC248    | cow     | 21      | 21      | 1             | 0              | 1            | 1           | 0           | 0          | 1A    |
| bovC403    | cow     | 4667    | 21      | 1             | 1              | 1            | 0           | 0           | 0          | 1A    |
| huBfR3883  | human   | 21      | 21      | 1             | 1              | 1            | 0           | 0           | 0          | 1A    |
| bovC486    | cow     | 21      | 21      | 1             | 1              | 1            | 1           | 0           | 0          | 1A    |
| meC0001-1  | turkey  | 21      | 21      | 0             | 1              | 0            | 0           | 0           | 0          | 1A    |
| huBfR3869  | human   | 21      | 21      | 1             | 1              | 1            | 0           | 0           | 0          | 1A    |
| bovC399    | cow     | 21      | 21      | 1             | 0              | 1            | 1           | 0           | 0          | 1A    |
| bovC402    | cow     | 21      | 21      | 1             | 0              | 1            | 0           | 0           | 0          | 1A    |
| huE01      | human   | 21      | 21      | 1             | 1              | 1            | 0           | 0           | 0          | 1A    |
| bovC397    | cow     | 21      | 21      | 1             | 1              | 1            | 1           | 0           | 0          | 1A    |
| huBfR3872  | human   | 21      | 21      | 1             | 1              | 1            | 0           | 0           | 0          | 1A    |
| meC0287    | turkey  | 21      | 21      | 1             | 1              | 1            | 0           | 0           | 0          | 1A    |
| bovC250    | cow     | 21      | 21      | 1             | 0              | 1            | 0           | 0           | 0          | 1A    |
| huBfR3898  | human   | 21      | 21      | 1             | 1              | 1            | 0           | 0           | 0          | 1A    |
| huC19      | human   | 4648    | 21      | 1             | 1              | 0            | 0           | 0           | 0          | 1A    |
| huBfR3866  | human   | 53      | 21      | 1             | 1              | 0            | 0           | 0           | 0          | 1A    |
| huBfR3881  | human   | 53      | 21      | 1             | 1              | 1            | 0           | 0           | 0          | 1A    |
| huBfR3876  | human   | 53      | 21      | 1             | 1              | 1            | 0           | 0           | 0          | 1A    |
| huB02      | human   | 53      | 21      | 1             | 1              | 1            | 0           | 0           | 0          | 1A    |
| huB25      | human   | 53      | 21      | 1             | 1              | 1            | 0           | 0           | 0          | 1A    |
| huC18      | human   | 53      | 21      | 0             | 1              | 1            | 0           | 0           | 0          | 1A    |
| bov207     | cow     | 53      | 21      | 1             | 1              | 1            | 0           | 0           | 0          | 1A    |
| huBfR3865  | human   | 53      | 21      | 1             | 1              | 1            | 0           | 0           | 0          | 1A    |
| huC11      | human   | 2845    | 21      | 1             | 1              | 0            | 0           | 0           | 0          | 1B    |
| galBfR3922 | chicken | 46      | 206     | 1             | 1              | 0            | 0           | 0           | 0          | 1B    |
| galBfR3926 | chicken | 46      | 206     | 1             | 1              | 0            | 0           | 0           | 0          | 1B    |
| galBfR3951 | chicken | 46      | 206     | 1             | 1              | 0            | 0           | 0           | 0          | 1B    |
| huA24      | human   | 19      | 21      | 1             | 1              | 0            | 0           | 0           | 0          | 1B    |
| bovC508    | cow     | 19      | 21      | 1             | 1              | 0            | 0           | 0           | 0          | 1B    |
| huB06      | human   | 4631    | 446     | 1             | 1              | 0            | 0           | 0           | 0          | 1B    |
| gal7252NI  | chicken | 50      | 21      | 1             | 1              | 0            | 0           | 0           | 0          | 1B    |
| gal7278BB  | chicken | 50      | 21      | 1             | 1              | 0            | 0           | 0           | 0          | 1B    |
| huB15      | human   | 50      | 21      | 1             | 1              | 0            | 0           | 0           | 0          | 1B    |
| huC23      | human   | 50      | 21      | 1             | 1              | 0            | 0           | 0           | 0          | 1B    |
| gal7297BB  | chicken | 50      | 21      | 1             | 1              | 0            | 0           | 0           | 0          | 1B    |
| meC0133    | turkey  | 50      | 21      | 1             | 1              | 1            | 0           | 0           | 0          | 1B    |
| bov55      | cow     | 50      | 21      | 1             | 1              | 0            | 0           | 0           | 0          | 1B    |
| gal245     | chicken | 50      | 21      | 1             | 1              | 0            | 1           | 0           | 0          | 1B    |
| meC0340    | turkey  | 50      | 21      | 1             | 1              | 0            | 0           | 0           | 0          | 1B    |
| huA31      | human   | 50      | 21      | 1             | 1              | 0            | 0           | 0           | 0          | 1B    |
| huC01      | human   | 50      | 21      | 1             | 1              | 0            | 0           | 0           | 0          | 1B    |
| gal7292BB  | chicken | 50      | 21      | 1             | 1              | 0            | 0           | 0           | 0          | 1B    |
| meC0999    | turkey  | 4673    | 21      | 1             | 1              | 0            | 0           | 0           | 0          | 1B    |
| gal7240BW  | chicken | 4660    | 21      | 1             | 1              | 0            | 0           | 0           | 0          | 1B    |
| bov127     | cow     | 262     | 21      | 1             | 1              | 1            | 0           | 0           | 0          | 1B    |
| bovC0148   | cow     | 1704    | 21      | 1             | 1              | 0            | 0           | 0           | 0          | 1B    |
| huB24      | human   | 4639    | 21      | 1             | 1              | 1            | 1           | 0           | 0          | 1B    |
| huB17      | human   | 1823    | 21      | 1             | 1              | 1            | 0           | 0           | 0          | 1B    |
| bovC0172   | cow     | 1823    | 21      | 1             | 1              | 0            | 0           | 0           | 0          | 1B    |
| meC0438    | turkey  | 1823    | 21      | 0             | 1              | 1            | 0           | 0           | 0          | 1B    |
| huB14      | human   | 4635    | 21      | 1             | 1              | 1            | 1           | 0           | 0          | 1B    |
| huC02      | human   | 760     | 21      | 1             | 1              | 0            | 1           | 0           | 0          | 1B    |
| meC0450    | turkey  | 4672    | 21      | 0             | 1              | 0            | 0           | 0           | 0          | 1B    |

|             |         |      |      |   |   |   |   |   |   |    |
|-------------|---------|------|------|---|---|---|---|---|---|----|
| huC03       | human   | 4640 | 21   | 1 | 1 | 0 | 0 | 0 | 0 | 1B |
| bov66       | cow     | 4664 | 21   | 1 | 1 | 1 | 0 | 0 | 0 | 1B |
| gal7267BB   | chicken | 4661 | 21   | 1 | 1 | 0 | 0 | 0 | 0 | 1B |
| gal7280BY   | chicken | 4663 | 21   | 1 | 1 | 0 | 0 | 0 | 0 | 1B |
| huNCTC11168 | human   | 43   | 21   | 1 | 1 | 1 | 0 | 0 | 0 | 1B |
| huA05       | human   | 507  | 21   | 1 | 1 | 1 | 0 | 0 | 0 | 1B |
| huA17       | human   | 221  | 206  | 1 | 1 | 0 | 0 | 0 | 0 | 1B |
| galHW6      | chicken | 2192 | 206  | 1 | 1 | 0 | 0 | 0 | 0 | 1B |
| galHW1      | chicken | 2192 | 206  | 1 | 1 | 0 | 0 | 0 | 0 | 1B |
| galHW5      | chicken | 2192 | 206  | 1 | 1 | 0 | 0 | 0 | 0 | 1B |
| huA02       | human   | 4588 | 21   | 1 | 1 | 1 | 0 | 0 | 0 | 1B |
| huA21       | human   | 4588 | 21   | 1 | 1 | 1 | 0 | 0 | 0 | 1B |
| huA03       | human   | 1519 | 21   | 1 | 1 | 0 | 0 | 0 | 0 | 1B |
| huB09       | human   | 4286 | 21   | 1 | 1 | 0 | 0 | 0 | 0 | 1B |
| huE04       | human   | 48   | 48   | 1 | 1 | 0 | 1 | 0 | 0 | 1B |
| gal7073HE   | chicken | 48   | 48   | 1 | 1 | 0 | 0 | 0 | 0 | 1B |
| huB10       | human   | 48   | 48   | 1 | 1 | 0 | 0 | 0 | 0 | 1B |
| bovC246     | cow     | 48   | 48   | 1 | 1 | 0 | 0 | 0 | 0 | 1B |
| bovBfR3885  | cow     | 48   | 48   | 1 | 1 | 0 | 0 | 0 | 0 | 1B |
| huC14       | human   | 4645 | 48   | 1 | 1 | 0 | 0 | 0 | 0 | 1B |
| bovC0111    | cow     | 3158 | 48   | 1 | 1 | 0 | 0 | 0 | 0 | 1B |
| bovC090     | cow     | 3203 | 48   | 1 | 1 | 0 | 0 | 0 | 0 | 1B |
| huE05       | human   | 4591 | 48   | 1 | 1 | 0 | 0 | 0 | 0 | 1B |
| huE06       | human   | 4591 | 48   | 1 | 1 | 0 | 0 | 0 | 0 | 1B |
| bovC540     | cow     | 38   | 48   | 1 | 0 | 1 | 0 | 0 | 0 | 1B |
| bovC539     | cow     | 38   | 48   | 1 | 1 | 1 | 0 | 0 | 0 | 1B |
| bovC405     | cow     | 38   | 48   | 1 | 1 | 1 | 0 | 0 | 0 | 1B |
| huA10       | human   | 122  | 206  | 1 | 1 | 0 | 0 | 0 | 0 | 1B |
| huB18       | human   | 122  | 206  | 1 | 1 | 0 | 1 | 0 | 0 | 1B |
| huA28       | human   | 122  | 206  | 1 | 1 | 0 | 0 | 0 | 0 | 1B |
| galZH0097   | chicken | 122  | 206  | 1 | 1 | 0 | 0 | 0 | 0 | 1B |
| huA35       | human   | 122  | 206  | 1 | 1 | 0 | 0 | 0 | 0 | 1B |
| huB08       | human   | 4633 | 206  | 1 | 1 | 0 | 0 | 0 | 0 | 1B |
| huA13       | human   | 3188 | 206  | 1 | 1 | 0 | 0 | 0 | 0 | 1B |
| gal7275RP   | chicken | 4662 | 48   | 1 | 1 | 0 | 0 | 0 | 0 | 1B |
| gal7289BY   | chicken | 4662 | 48   | 1 | 1 | 1 | 0 | 0 | 0 | 1B |
| huE16       | human   | 4654 | none | 1 | 1 | 0 | 0 | 0 | 0 | 1B |
| huB07       | human   | 4632 | 206  | 0 | 1 | 0 | 0 | 0 | 0 | 1B |
| huE13       | human   | 4652 | 206  | 1 | 1 | 0 | 0 | 0 | 0 | 1B |
| huC17       | human   | 4647 | 48   | 1 | 1 | 0 | 0 | 0 | 0 | 1B |
| bovC323     | cow     | 4647 | 48   | 1 | 1 | 0 | 0 | 0 | 0 | 1B |
| huA34       | human   | 572  | 206  | 1 | 1 | 0 | 0 | 0 | 0 | 1B |
| bov159      | cow     | 572  | 206  | 1 | 1 | 0 | 0 | 0 | 0 | 1B |
| huA26       | human   | 572  | 206  | 1 | 1 | 0 | 0 | 0 | 0 | 1B |
| huA20       | human   | 572  | 206  | 1 | 1 | 0 | 0 | 0 | 0 | 1B |
| gal7060SN   | chicken | 572  | 206  | 1 | 1 | 0 | 0 | 0 | 0 | 1B |
| galHS06     | chicken | 4657 | none | 1 | 1 | 0 | 0 | 0 | 0 | 1B |
| galHS13     | chicken | 3529 | none | 1 | 1 | 0 | 0 | 0 | 0 | 1B |
| galHS04     | chicken | 3529 | none | 1 | 1 | 0 | 0 | 0 | 0 | 1B |
| galHS12     | chicken | 3529 | none | 1 | 1 | 0 | 0 | 0 | 0 | 1B |
| meC0128     | turkey  | 2175 | none | 1 | 1 | 0 | 0 | 0 | 0 | 1B |
| huBfR3933   | human   | 563  | 177  | 1 | 0 | 0 | 0 | 1 | 0 | 1B |
| huE02       | human   | 49   | 49   | 1 | 1 | 0 | 0 | 0 | 0 | 1B |
| galBfR3948  | chicken | 49   | 49   | 1 | 1 | 0 | 0 | 0 | 0 | 1B |
| huB12       | human   | 4634 | 49   | 1 | 1 | 0 | 0 | 0 | 0 | 1B |
| huA33       | human   | 4590 | 49   | 1 | 1 | 0 | 0 | 0 | 0 | 1B |
| huA06       | human   | 4587 | 49   | 1 | 1 | 0 | 0 | 0 | 0 | 1B |
| huC16       | human   | 4646 | 460  | 1 | 1 | 0 | 0 | 0 | 0 | 1B |
| huA14       | human   | 380  | none | 1 | 1 | 0 | 0 | 0 | 0 | 1B |
| huB22       | human   | 380  | none | 1 | 1 | 0 | 0 | 0 | 0 | 1B |
| galHR1      | chicken | 2897 | none | 1 | 1 | 0 | 0 | 0 | 0 | 1B |
| galHR5      | chicken | 2897 | none | 1 | 1 | 0 | 0 | 0 | 0 | 1B |
| galHR4      | chicken | 2897 | none | 1 | 1 | 0 | 0 | 0 | 0 | 1B |
| meC0282     | turkey  | 450  | 446  | 1 | 1 | 0 | 0 | 0 | 0 | 1B |
| huE12       | human   | 450  | 446  | 1 | 1 | 0 | 0 | 0 | 0 | 1B |
| huB06       | human   | 4631 | 446  | 1 | 1 | 0 | 0 | 0 | 0 | 1B |
| gal4116NI   | chicken | 450  | 446  | 1 | 1 | 0 | 0 | 0 | 0 | 1B |
| gal08B5018  | chicken | 22   | 22   | 1 | 1 | 0 | 1 | 1 | 1 | 2A |
| huBfR1764   | human   | 22   | 22   | 0 | 0 | 0 | 1 | 1 | 1 | 2A |
| bovC117     | cow     | 22   | 22   | 1 | 0 | 0 | 1 | 1 | 1 | 2A |
| huB23       | human   | 22   | 22   | 1 | 0 | 0 | 1 | 1 | 1 | 2A |
| huE19       | human   | 22   | 22   | 1 | 0 | 0 | 1 | 1 | 1 | 2A |

|            |         |      |      |   |   |   |   |   |   |           |
|------------|---------|------|------|---|---|---|---|---|---|-----------|
| gal08B5020 | chicken | 22   | 22   | 1 | 0 | 0 | 1 | 1 | 1 | 2A        |
| galBfR3874 | chicken | 1739 | 22   | 1 | 0 | 0 | 1 | 1 | 1 | 2A        |
| huB21      | human   | 4638 | 22   | 1 | 0 | 0 | 1 | 1 | 0 | 2A        |
| huA30      | human   | 447  | 42   | 1 | 0 | 0 | 1 | 0 | 0 | 2A        |
| galBfR4327 | chicken | 1003 | 45   | 0 | 0 | 0 | 1 | 0 | 0 | 2A        |
| bovC171    | cow     | 4669 | none | 1 | 0 | 0 | 1 | 0 | 0 | 2A        |
| hu81-176   | human   | 913  | 42   | 1 | 0 | 0 | 1 | 1 | 1 | 2A        |
| bovC084    | cow     | 4670 | 42   | 1 | 0 | 0 | 1 | 1 | 0 | 2A        |
| huE18      | human   | 4592 | 42   | 1 | 0 | 1 | 1 | 0 | 0 | 2A        |
| huBfR3918  | human   | 42   | 42   | 1 | 0 | 0 | 1 | 1 | 1 | 2A        |
| gal7107BY  | chicken | 42   | 42   | 1 | 0 | 0 | 1 | 1 | 0 | 2A        |
| bovC537    | cow     | 42   | 42   | 1 | 1 | 0 | 1 | 1 | 0 | 2A        |
| galBfR3950 | chicken | 564  | 283  | 0 | 0 | 0 | 1 | 1 | 1 | 2B        |
| huB05      | human   | 137  | 45   | 0 | 0 | 0 | 1 | 1 | 1 | 2B        |
| galHB7     | chicken | 4593 | 45   | 0 | 0 | 0 | 1 | 1 | 1 | 2B        |
| huE21      | human   | 137  | 45   | 0 | 0 | 0 | 1 | 1 | 1 | 2B        |
| huBfR4010  | human   | 483  | 45   | 0 | 0 | 0 | 0 | 1 | 1 | 2B        |
| galBfR3914 | chicken | 295  | 45   | 0 | 0 | 0 | 1 | 1 | 1 | 2B        |
| huA23      | human   | 267  | 283  | 0 | 0 | 0 | 1 | 1 | 1 | 2B        |
| huBfR3907  | human   | 267  | 283  | 0 | 0 | 0 | 1 | 1 | 1 | 2B        |
| huC08      | human   | 383  | 283  | 0 | 0 | 0 | 1 | 1 | 1 | 2B        |
| huBfR1780  | human   | 583  | 45   | 0 | 0 | 0 | 1 | 1 | 1 | 2B        |
| huC13      | human   | 583  | 45   | 0 | 0 | 0 | 1 | 0 | 1 | 2B        |
| huBfR1781  | human   | 583  | 45   | 0 | 0 | 0 | 1 | 1 | 1 | 2B        |
| gal356     | chicken | 230  | 45   | 1 | 0 | 0 | 1 | 1 | 1 | 2B        |
| huE14      | human   | 4653 | 45   | 1 | 1 | 0 | 1 | 1 | 1 | 2B        |
| huA32      | human   | 538  | 45   | 0 | 0 | 0 | 1 | 1 | 1 | 2B        |
| huE17      | human   | 4655 | 45   | 1 | 0 | 0 | 0 | 1 | 1 | 2B        |
| huA19      | human   | 11   | 45   | 1 | 0 | 0 | 0 | 1 | 1 | 2B        |
| galBfR4009 | chicken | 3036 | 45   | 0 | 0 | 0 | 1 | 1 | 1 | 2B        |
| galBfR3944 | chicken | 45   | 45   | 0 | 0 | 0 | 1 | 0 | 0 | 2B        |
| huBfR3868  | human   | 45   | 45   | 0 | 0 | 0 | 1 | 1 | 1 | 2B        |
| huBfR3880  | human   | 45   | 45   | 0 | 0 | 0 | 1 | 1 | 1 | 2B        |
| huC12      | human   | 45   | 45   | 0 | 0 | 0 | 1 | 0 | 1 | 2B        |
| huBfR3867  | human   | 45   | 45   | 0 | 0 | 0 | 1 | 1 | 1 | 2B        |
| huBfR3895  | human   | 45   | 45   | 0 | 0 | 0 | 1 | 1 | 1 | 2B        |
| huC15      | human   | 45   | 45   | 0 | 0 | 0 | 0 | 1 | 1 | 2B        |
| galBfR4232 | chicken | 45   | 45   | 0 | 0 | 0 | 1 | 1 | 0 | 2B        |
| meC0408    | turkey  | 45   | 45   | 0 | 0 | 0 | 1 | 1 | 1 | 2B        |
| bovBfR3929 | cow     | 45   | 45   | 0 | 0 | 0 | 1 | 1 | 1 | 2B        |
| huC27      | human   | 45   | 45   | 0 | 0 | 0 | 1 | 1 | 1 | 2B        |
| galBfR3949 | chicken | 45   | 45   | 0 | 0 | 0 | 1 | 0 | 0 | 2B        |
| huBfR4007  | human   | 45   | 45   | 0 | 0 | 0 | 1 | 1 | 1 | 2B        |
| bovBfR3899 | cow     | 45   | 45   | 0 | 0 | 0 | 1 | 1 | 0 | 2B        |
| galHS11    | chicken | 45   | 45   | 1 | 0 | 0 | 1 | 1 | 1 | 2B        |
| huBfR3894  | human   | 45   | 45   | 0 | 0 | 0 | 1 | 0 | 0 | 2B        |
| huE08      | human   | 4625 | none | 1 | 0 | 0 | 1 | 0 | 0 | singleton |
| meC1541    | turkey  | 4430 | none | 0 | 0 | 0 | 1 | 0 | 0 | singleton |
| huB04      | human   | 475  | 48   | 0 | 1 | 0 | 0 | 0 | 0 | 3A        |
| huB20      | human   | 4637 | 52   | 1 | 1 | 0 | 0 | 0 | 0 | 3A        |
| huC25      | human   | 775  | 52   | 1 | 1 | 0 | 0 | 0 | 0 | 3A        |
| huA22      | human   | 4630 | 52   | 1 | 1 | 0 | 0 | 0 | 0 | 3A        |
| meC0847    | turkey  | 2091 | 52   | 0 | 1 | 0 | 0 | 0 | 0 | 3A        |
| huC10      | human   | 4644 | none | 1 | 1 | 0 | 0 | 0 | 0 | 3A        |
| gal7090TH  | chicken | 2274 | none | 1 | 1 | 0 | 0 | 0 | 0 | 3A        |
| meC0281    | turkey  | 828  | 828  | 0 | 1 | 0 | 0 | 0 | 0 | 3A        |
| meC0467    | turkey  | 828  | 828  | 1 | 1 | 1 | 0 | 0 | 0 | 3A        |
| meC0280    | turkey  | 828  | 828  | 0 | 1 | 0 | 0 | 0 | 0 | 3A        |
| huC04      | human   | 4641 | 607  | 1 | 1 | 0 | 0 | 0 | 0 | 3A        |
| huC05      | human   | 4642 | 353  | 1 | 1 | 0 | 0 | 0 | 0 | 3A        |
| huC09      | human   | 1287 | 1287 | 1 | 0 | 0 | 1 | 0 | 0 | 3A        |
| huA09      | human   | 354  | 354  | 1 | 1 | 0 | 0 | 0 | 0 | 3A        |
| huB16      | human   | 354  | 354  | 1 | 1 | 0 | 0 | 0 | 0 | 3A        |
| huE07      | human   | 4650 | 354  | 1 | 1 | 0 | 0 | 0 | 0 | 3A        |
| huB03      | human   | 535  | 460  | 1 | 1 | 0 | 0 | 0 | 0 | 3A        |
| meC0374    | turkey  | 824  | 257  | 1 | 1 | 0 | 0 | 0 | 0 | 3A        |
| huC20      | human   | 51   | 443  | 1 | 1 | 0 | 0 | 0 | 0 | 3A        |
| huC24      | human   | 51   | 443  | 1 | 1 | 0 | 0 | 0 | 0 | 3A        |
| meC0283    | turkey  | 443  | 443  | 1 | 0 | 0 | 1 | 0 | 0 | 3A        |
| huA11      | human   | 2034 | 443  | 1 | 1 | 0 | 0 | 0 | 0 | 3A        |
| galHS02    | chicken | 353  | 353  | 1 | 1 | 0 | 0 | 0 | 0 | 3A        |
| galHS14    | chicken | 353  | 353  | 1 | 1 | 0 | 0 | 0 | 0 | 3A        |

|            |         |      |      |   |   |   |   |   |   |           |
|------------|---------|------|------|---|---|---|---|---|---|-----------|
| gal7126RP  | chicken | 353  | 353  | 1 | 1 | 0 | 0 | 0 | 0 | 3A        |
| galHS07    | chicken | 353  | 353  | 1 | 1 | 0 | 0 | 0 | 0 | 3A        |
| galHS09    | chicken | 353  | 353  | 1 | 1 | 0 | 0 | 0 | 0 | 3A        |
| galHS03    | chicken | 4656 | 353  | 1 | 1 | 0 | 1 | 0 | 0 | 3A        |
| galHS08    | chicken | 4658 | 353  | 1 | 1 | 0 | 0 | 0 | 0 | 3A        |
| huA29      | human   | 658  | 658  | 1 | 1 | 0 | 0 | 0 | 0 | 3A        |
| huC07      | human   | 4643 | 658  | 1 | 1 | 0 | 0 | 0 | 0 | 3A        |
| galHS05    | chicken | 1900 | 658  | 1 | 1 | 0 | 0 | 0 | 0 | 3A        |
| gal7270BW  | chicken | 2288 | 354  | 1 | 1 | 0 | 0 | 0 | 0 | 3A        |
| meC0130    | turkey  | 2288 | 354  | 1 | 1 | 0 | 0 | 0 | 0 | 3A        |
| galHW4     | chicken | 464  | none | 1 | 1 | 0 | 0 | 0 | 0 | 3A        |
| meC0680    | turkey  | 464  | none | 1 | 1 | 0 | 0 | 0 | 0 | 3A        |
| galHW7     | chicken | 464  | none | 1 | 1 | 0 | 0 | 0 | 0 | 3A        |
| galHW3     | chicken | 464  | none | 1 | 1 | 0 | 0 | 0 | 0 | 3A        |
| huA27      | human   | 464  | none | 1 | 1 | 0 | 0 | 0 | 0 | 3A        |
| galHW2     | chicken | 464  | none | 1 | 1 | 0 | 0 | 0 | 0 | 3A        |
| huB19      | human   | 4636 | none | 1 | 1 | 0 | 1 | 0 | 0 | 3A        |
| bov60      | cow     | 4665 | 61   | 1 | 1 | 1 | 0 | 0 | 0 | 3B        |
| bovC406    | cow     | 4668 | 61   | 1 | 1 | 1 | 0 | 0 | 0 | 3B        |
| meC0129    | turkey  | 1348 | 61   | 1 | 1 | 0 | 0 | 0 | 0 | 3B        |
| bovC535    | cow     | 4666 | 61   | 1 | 1 | 1 | 0 | 0 | 0 | 3B        |
| bovC325    | cow     | 628  | 61   | 1 | 0 | 1 | 0 | 0 | 0 | 3B        |
| bov277     | cow     | 352  | 61   | 1 | 1 | 1 | 0 | 0 | 0 | 3B        |
| huBfR3943  | human   | 60   | 61   | 1 | 1 | 1 | 0 | 0 | 0 | 3B        |
| huBfR3947  | human   | 60   | 61   | 1 | 1 | 1 | 0 | 0 | 0 | 3B        |
| huE03      | human   | 61   | 61   | 1 | 1 | 1 | 0 | 0 | 0 | 3B        |
| bovBfR3889 | cow     | 61   | 61   | 1 | 1 | 1 | 0 | 0 | 0 | 3B        |
| bovBfR3912 | cow     | 61   | 61   | 1 | 1 | 1 | 0 | 0 | 0 | 3B        |
| huA04      | human   | 4626 | 1034 | 0 | 0 | 0 | 1 | 0 | 0 | 4         |
| gal7085NW  | chicken | 2367 | none | 0 | 1 | 0 | 1 | 0 | 0 | 4         |
| huE22      | human   | 696  | 1332 | 0 | 0 | 0 | 1 | 0 | 0 | 4         |
| meC1466    | turkey  | 696  | 1332 | 0 | 1 | 0 | 1 | 0 | 1 | 4         |
| meC1496    | turkey  | 4674 | 1034 | 0 | 0 | 0 | 1 | 0 | 0 | 4         |
| gal509     | chicken | 977  | 1034 | 0 | 0 | 0 | 1 | 0 | 0 | 4         |
| meC0306    | turkey  | 4671 | 1034 | 1 | 1 | 0 | 0 | 0 | 0 | 4         |
| meC0816    | turkey  | 1709 | 1034 | 0 | 0 | 0 | 1 | 0 | 0 | 4         |
| huE11      | human   | 4651 | none | 1 | 1 | 0 | 0 | 0 | 0 | 5         |
| galHS01    | chicken | 877  | none | 1 | 1 | 0 | 0 | 0 | 0 | 5         |
| galHS10    | chicken | 877  | none | 1 | 1 | 0 | 1 | 0 | 0 | 5         |
| galHS16    | chicken | 4659 | none | 1 | 1 | 0 | 0 | 0 | 0 | 5         |
| huC22      | human   | 584  | 257  | 1 | 0 | 0 | 1 | 1 | 0 | 6         |
| huE15      | human   | 4571 | 257  | 1 | 0 | 0 | 1 | 1 | 0 | 6         |
| gal7111BY  | chicken | 990  | 257  | 1 | 0 | 0 | 1 | 0 | 0 | 6         |
| huE23      | human   | 257  | 257  | 1 | 0 | 0 | 1 | 1 | 0 | 6         |
| huB11      | human   | 257  | 257  | 1 | 0 | 0 | 1 | 1 | 0 | 6         |
| huB13      | human   | 257  | 257  | 1 | 0 | 0 | 1 | 1 | 0 | 6         |
| huC28      | human   | 257  | 257  | 0 | 0 | 0 | 1 | 1 | 0 | 6         |
| huA16      | human   | 257  | 257  | 1 | 1 | 0 | 1 | 1 | 0 | 6         |
| meC0475    | turkey  | 257  | 257  | 1 | 0 | 0 | 1 | 1 | 0 | 6         |
| huA08      | human   | 677  | 677  | 0 | 0 | 0 | 1 | 1 | 0 | singleton |
| huA25      | human   | 4589 | 52   | 1 | 1 | 1 | 0 | 0 | 0 | singleton |
| meC0149    | turkey  | 4675 | 443  | 1 | 1 | 0 | 0 | 0 | 0 | singleton |
| gal7258TH  | chicken | 4676 | none | 1 | 1 | 0 | 1 | 0 | 0 | singleton |
| huC21      | human   | 4649 | 354  | 1 | 1 | 0 | 0 | 0 | 0 | singleton |

### Legend

**Isolate origin:** Human isolates are marked blue (prefix „hu“ for human), chicken isolates yellow (prefix „gal“ for Gallus gallus), bovine isolates red (prefix „bov“ for Bovini) and turkey isolates green (prefix „me“ for Meleagris gallopavo).

**Evolutionary distance:** MLST-ST (Multilocus sequence typing – sequence type); MLST-CC (Multilocus sequence typing – clonal complex). The order of isolates given in the first column is equivalent to the arrangement of the isolates in the UMPGA-tree (see supplementary figure 1)

**Marker genes:** *cjj1367*: short writing for the gene *cjj81176-1367/1371* encoding a serin-protease; *cj1585c*: gene encoding an oxidoreductase replacing *dmsA-D* in NCTC 11168; *dtp7*: dimeric transducer like protein 7- encoded by the genes *cj0951and* *cj0952c*; *dmsA*: gene encoding the dimethyl sulfoxide oxidoreductase subunit A; *ansB*: gene encoding an asparaginase gene with an accessory N-terminal sec-dependent secretion signal for periplasmic localization of the enzyme; *ggg*: gene encoding the  $\gamma$ -glutamyl-transpeptidase; Presence of a genetic maker is marked with „1“ and a light red shade, absence with „0“ and a light green shade;
